# Supplementary material for: 丰韵的形象别具的韵味——《秋风野菊》美点赏读指要
Source: Royal Society of Chemistry journal article supplement (doi:10.1039/d2ob01221a), 2010-01-01
Supplement: d2ob01221a1.pdf [file d2ob01221a1.pdf]

## Supporting information

### Facile chemoenzymatic synthesis of unmodified anticoagulant ultra-low molecular weight heparin

Guijiao Zhang,<sup>a</sup> Kaihua Yang,<sup>a</sup> Lin Wang,<sup>a</sup> Yanzhen Cheng<sup>a</sup> and Chunhui Liu<sup>\*ab</sup>

a. Key Laboratory of Chemical Biology (Ministry of Education), Institute of Biochemical and Biotechnological Drugs, School of Pharmaceutical Sciences, Cheeloo College of Medicine, Shandong University, Jinan 250012, Shandong, PR China.

b. National Glycoengineering Research Center, Shandong University, Jinan 250012, Shandong, PR China.

## Contents

|                                                                                                     |    |
|-----------------------------------------------------------------------------------------------------|----|
| Fig. S1. The ESI-MS and <sup>1</sup> H NMR spectra of 11(A) and 12(B).....                          | 2  |
| Fig. S2. The purity(A), ESI-MS (B), <sup>1</sup> H NMR (C) and HSQC (D) spectra of 3.....           | 3  |
| Fig. S3. The purity(A), ESI-MS (B), <sup>1</sup> H NMR (C) and HSQC (D) spectra of 3a.....          | 4  |
| Fig. S4. The purity(A), ESI-MS (B), <sup>1</sup> H NMR (C) and HSQC (D) spectra of 3b.....          | 5  |
| Fig. S5. The ESI-MS spectra of 14(A),15(B), <i>N</i> -sulfated tetrasaccharide of 14(C) and 16(D) . | 6  |
| Fig. S6. The purity(A), ESI-MS (B), <sup>1</sup> H NMR (C) and HSQC (D) spectra of 17.....          | 7  |
| Fig. S7. The purity(A), ESI-MS (B), <sup>1</sup> H NMR (C) and HSQC (D) spectra of 18.....          | 8  |
| Fig. S8. The purity(A), ESI-MS (B), <sup>1</sup> H NMR (C) and HSQC (D) spectra of 19.....          | 9  |
| Fig. S9. The purity(A), ESI-MS (B), <sup>1</sup> H NMR (C) and HSQC (D) spectra of 20.....          | 10 |
| Fig. S10. Chromatograms of 19(A) and 20(B) after disaccharide analysis.....                         | 11 |

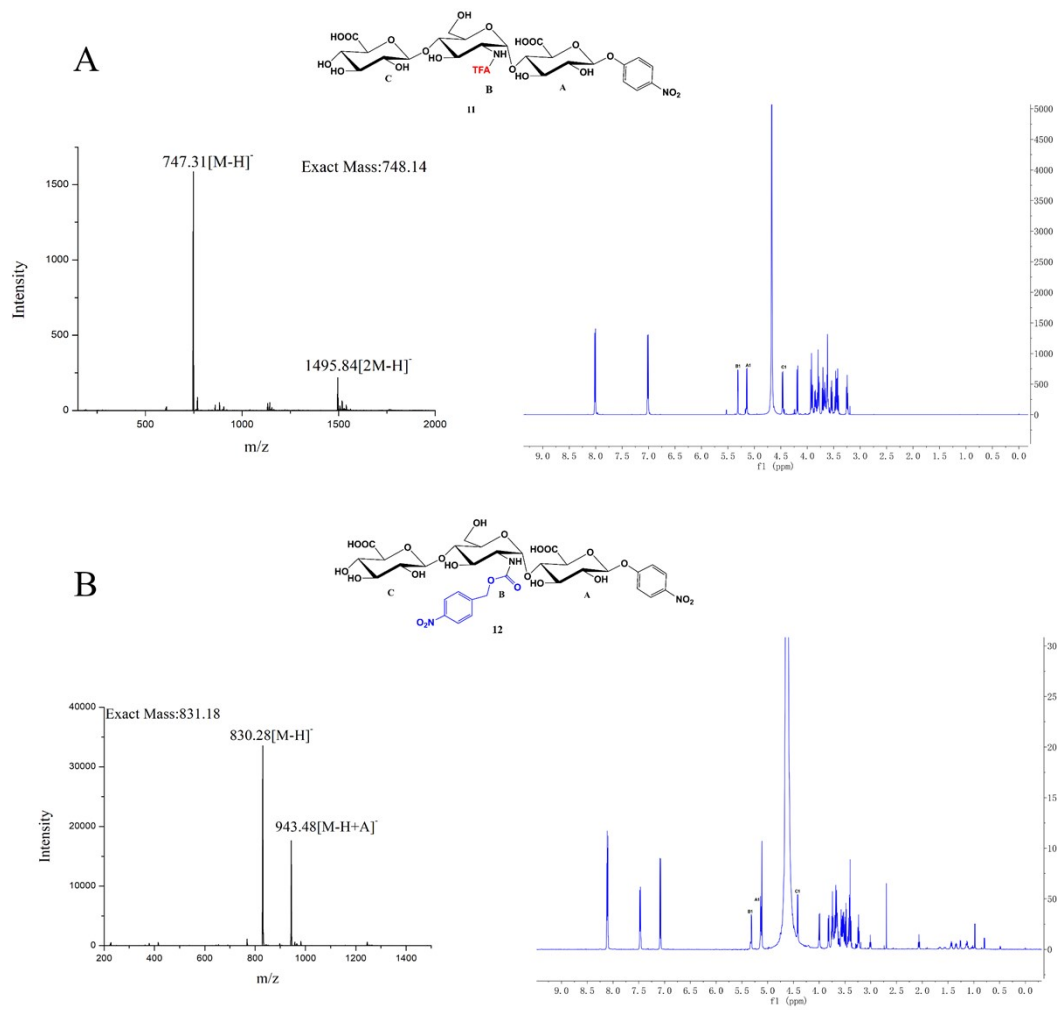

Fig. S1. (A) The ESI-MS and <sup>1</sup>H NMR spectra of 11; (B) The ESI-MS and <sup>1</sup>H NMR spectra of 12, where A is the deprotonated anion of trifluoroacetic acid

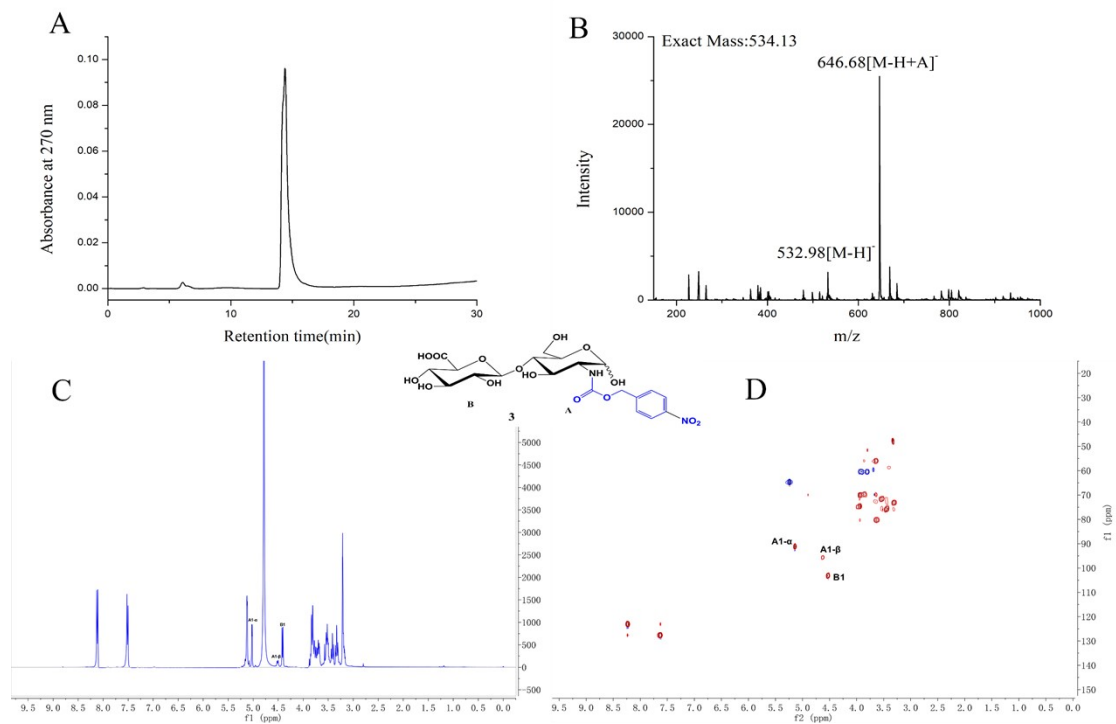

Fig. S2. The purity(A), ESI-MS (B), <sup>1</sup>H NMR (C) and HSQC (D) spectra of 3, where A is the deprotonated anion of trifluoroacetic acid.

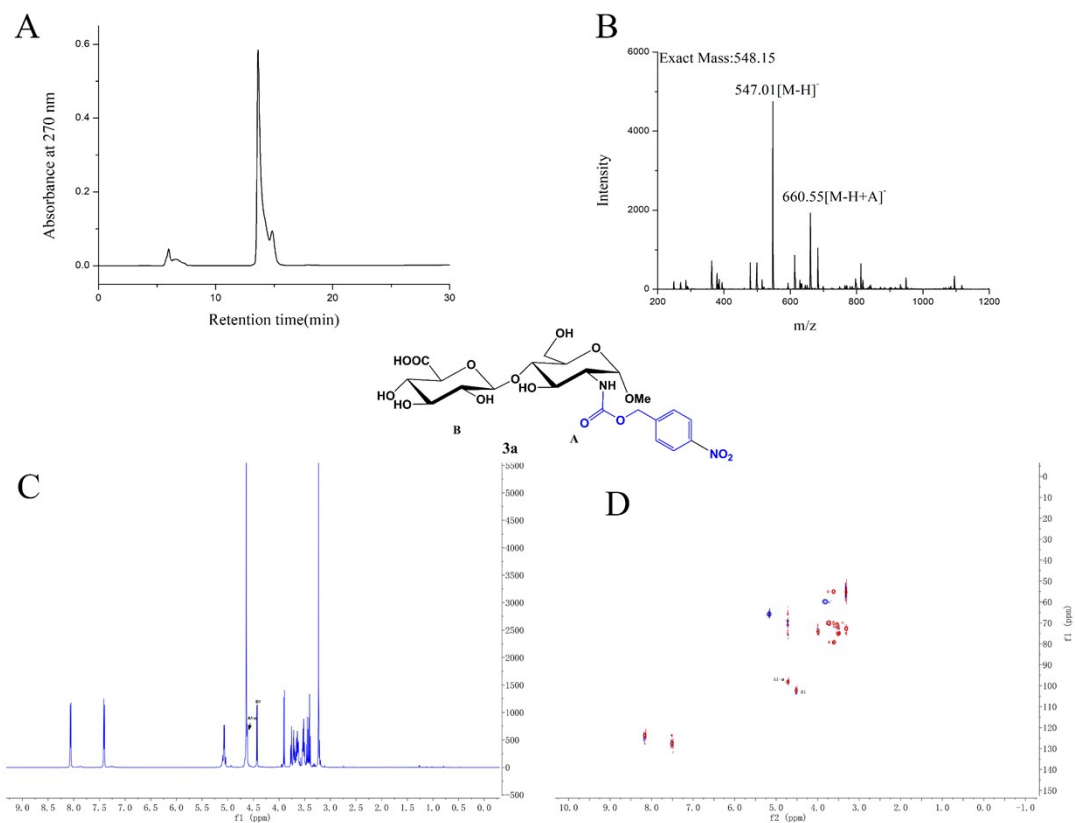

Fig. S3. The purity(A), ESI-MS (B), <sup>1</sup>H NMR (C) and HSQC (D) spectra of 3a, , where A is the deprotonated anion of trifluoroacetic acid.

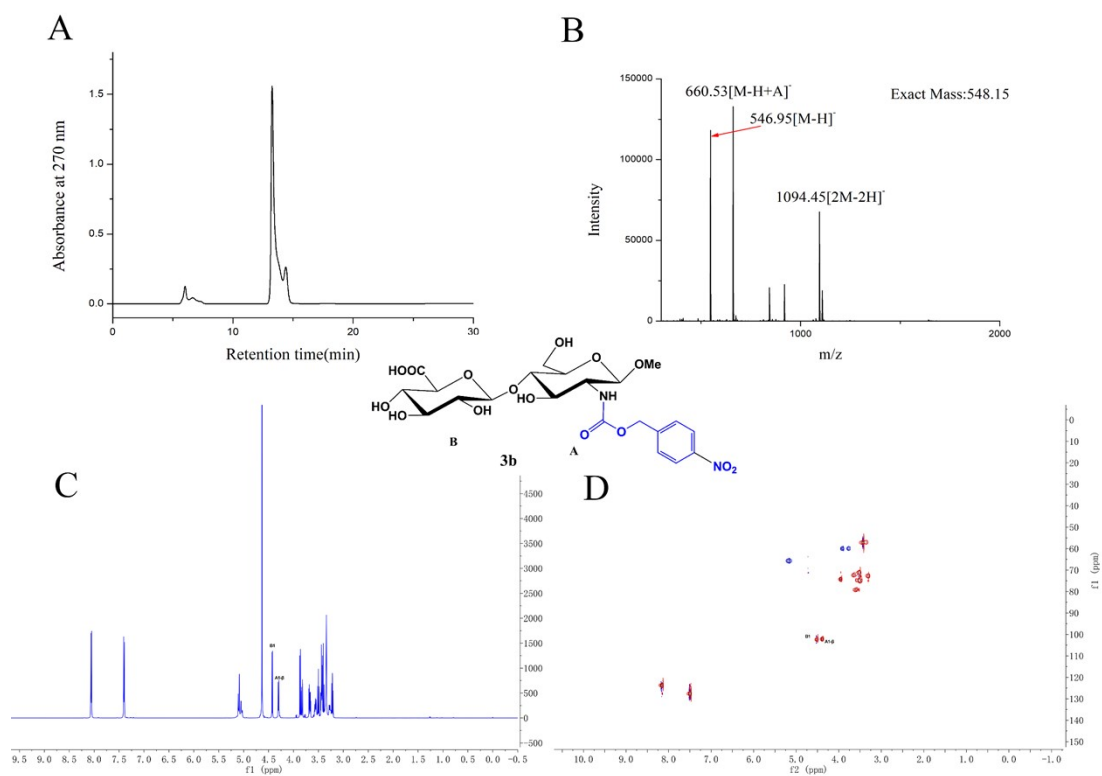

Fig. S4. The purity(A), ESI-MS (B), <sup>1</sup>H NMR (C) and HSQC (D) spectra of 3b, where A is the deprotonated anion of trifluoroacetic acid

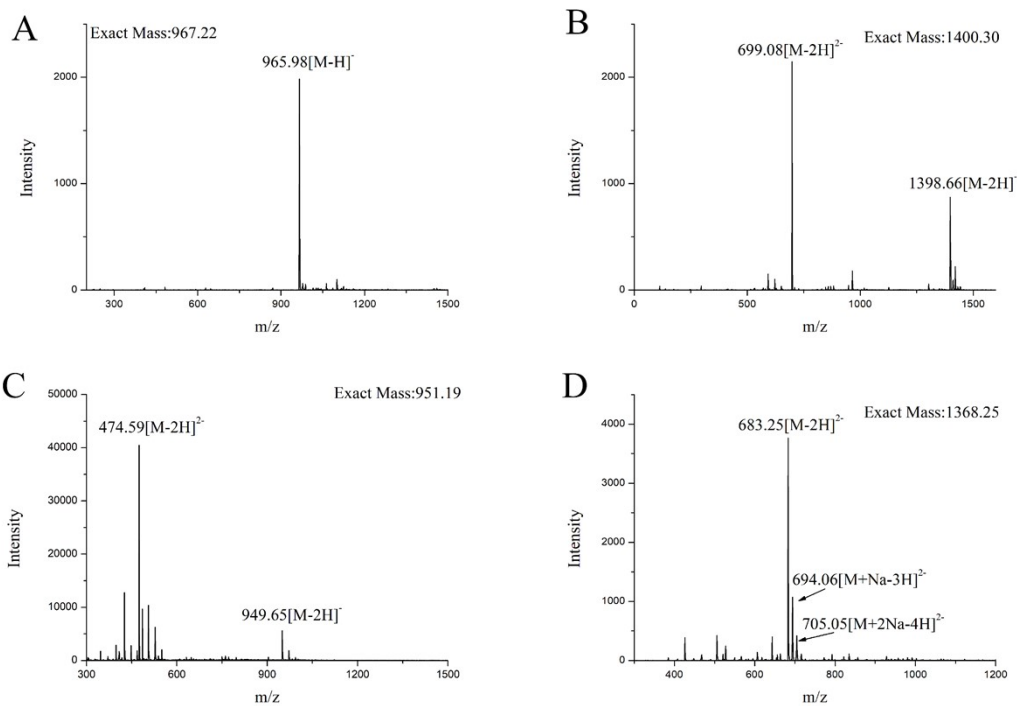

Fig. S5. The ESI-MS spectra of 14(A), 15(B), *N*-sulfated tetrasaccharide of 14(C) and 16(D)

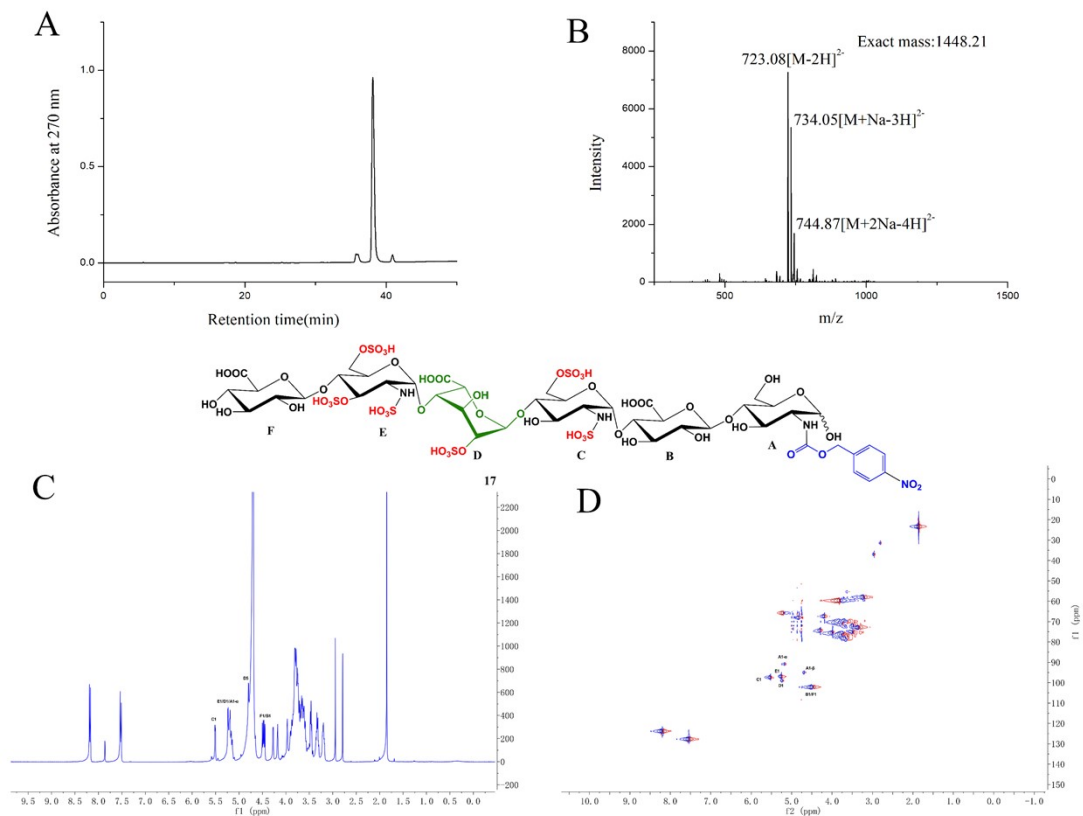

Fig. S6. The purity(A), ESI-MS (B),  $^1\text{H}$  NMR (C) and HSQC (D) spectra of 17.

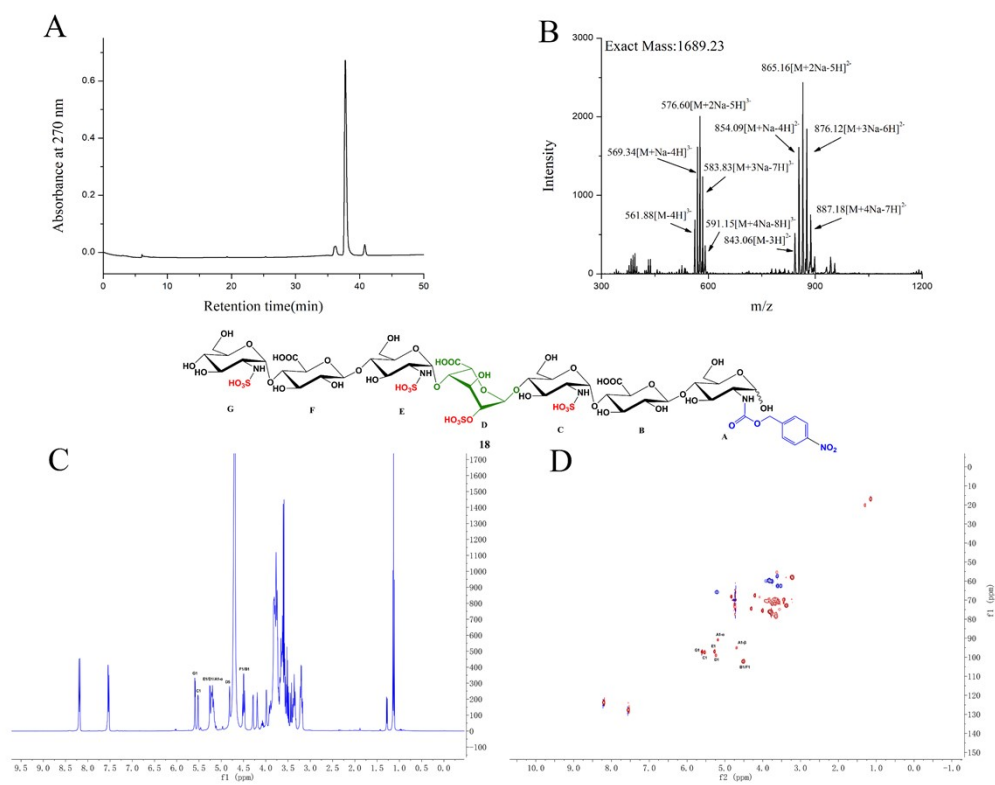

Fig. S7. The purity(A), ESI-MS (B),  $^1\text{H}$  NMR (C) and HSQC (D) spectra of 18.

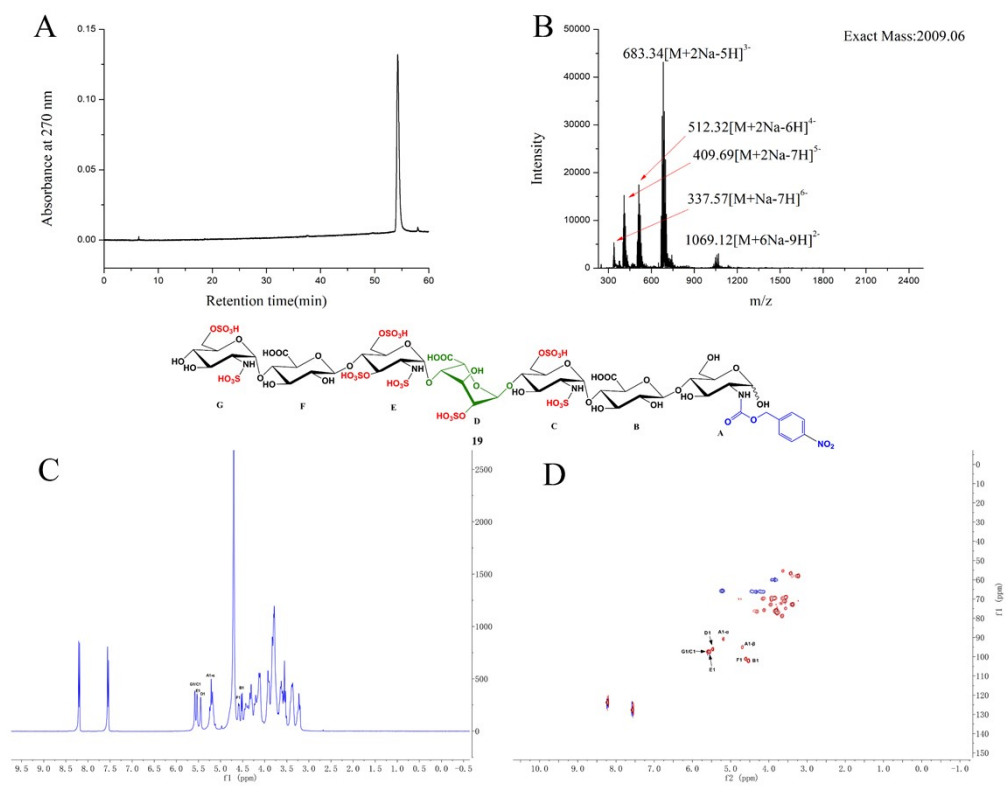

Fig. S8. The purity(A), ESI-MS (B), <sup>1</sup>H NMR (C) and HSQC (D) spectra of 19.



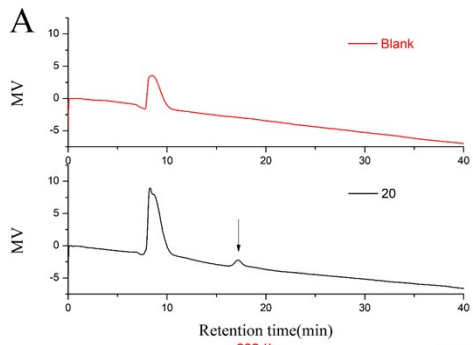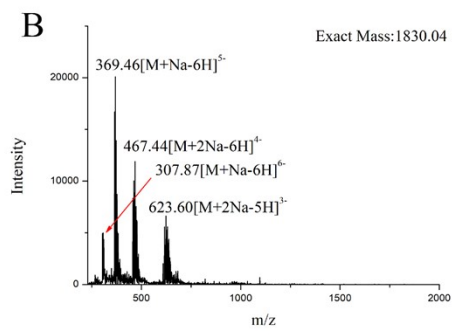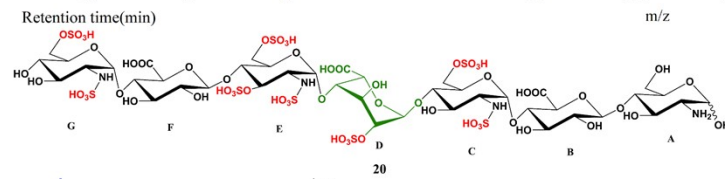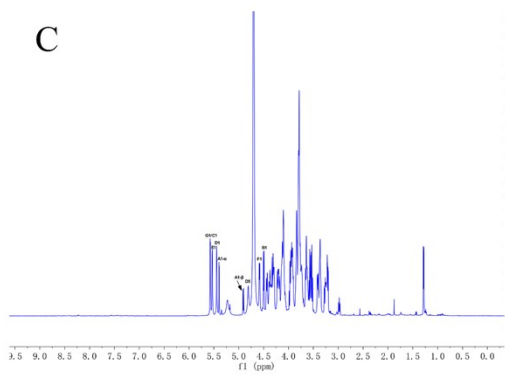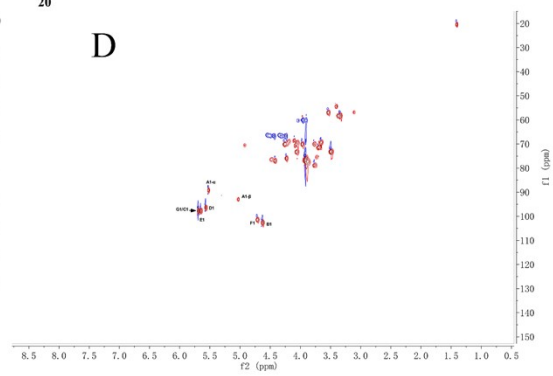

Fig. S9. The purity(A), ESI-MS (B),  $^1\text{H}$  NMR (C) and HSQC (D) spectra of 20.

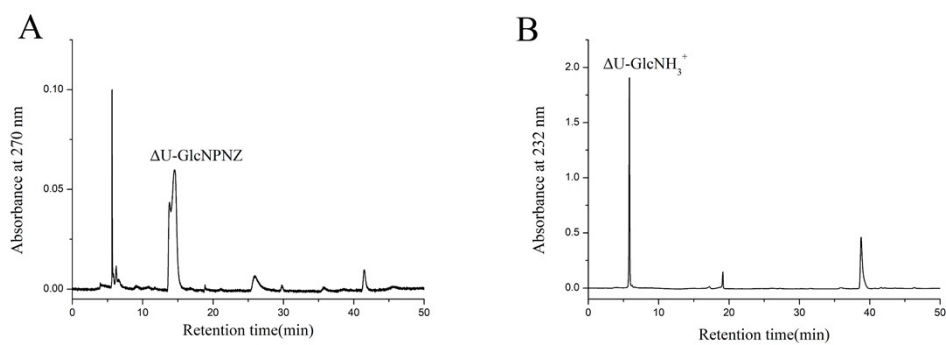

Fig. S10. Chromatograms of 19(A) and 20(B) after disaccharide analysis
